# Supplementary material for: Interactome-transcriptome analysis discovers signatures complementary to GWAS Loci of Type 2 Diabetes
Source: PubMed Central journal article supplement (PMC5067504; doi:10.1038/srep35228), 2016-10-18
Supplement: srep35228-s1.pdf [file srep35228-s1.pdf]

## *Supplementary material*

### **Interactome-transcriptome analysis discovers signatures complementary to GWAS Loci of Type 2 Diabetes**

#### **Authors and Affiliations**

Jing-Woei Li<sup>1,2</sup>, Heung-Man Lee<sup>3,4,5</sup>, Ying Wang<sup>3,4</sup>, Amy Hin-Yan Tong<sup>4</sup>, Kevin Y. Yip<sup>1,5,6</sup>, Stephen Kwok-Wing Tsui<sup>1,2,5</sup>, Si Lok<sup>4</sup>, Risa Ozaki<sup>3,4,5</sup>, Andrea O Luk<sup>3,4,5</sup>, Alice P. S. Kong<sup>3,4,5</sup>, Wing-Yee So<sup>3,4,5</sup>, Ronald C.W. Ma<sup>3,4,5</sup>, Juliana C.N. Chan<sup>3,4,5\*</sup>, Ting-Fung Chan<sup>1,5,6\*</sup>

<sup>1</sup>Hong Kong Bioinformatics Centre, School of Life Sciences, The Chinese University of Hong Kong, Shatin, N.T., Hong Kong

<sup>2</sup>Division of Genomics and Bioinformatics, School of Biomedical Sciences, The Chinese University of Hong Kong, Shatin, N.T., Hong Kong

<sup>3</sup>Department of Medicine and Therapeutics, The Chinese University of Hong Kong, Prince of Wales Hospital, Shatin, N.T., Hong Kong

<sup>4</sup>Li Ka Shing Institute of Health Science, The Chinese University of Hong Kong, Prince of Wales Hospital, Shatin, N.T., Hong Kong

<sup>5</sup>Hong Kong Institute of Diabetes and Obesity, The Chinese University of Hong Kong, Prince of Wales Hospital, Shatin, N.T., Hong Kong

<sup>6</sup>Department of Computer Science and Engineering, The Chinese University of Hong Kong, Shatin, N.T., Hong Kong

#### *E-mail address:*

Jing-Woei Li: [marcowanger@gmail.com](mailto:marcowanger@gmail.com)

Heung-Man Lee: [leehman@gmail.com](mailto:leehman@gmail.com)

Ying Wang: [wying@gmail.com](mailto:wying@gmail.com)

Amy Hin Yan Tong: [amyhytong@gmail.com](mailto:amyhytong@gmail.com)

Kevin Y. Yip: [kevinyip@cse.cuhk.edu.hk](mailto:kevinyip@cse.cuhk.edu.hk)

Stephen Kwok-Wing Tsui: [kwtsui@cuhk.edu.hk](mailto:kwtsui@cuhk.edu.hk)

Si Lok: [lok1313@icloud.com](mailto:lok1313@icloud.com)

Risa Ozaki: [risaozaki@cuhk.edu.hk](mailto:risaozaki@cuhk.edu.hk)

Andrea O Luk: [andrealuk@cuhk.edu.hk](mailto:andrealuk@cuhk.edu.hk)

Alice P. S. Kong: [alicekong@cuhk.edu.hk](mailto:alicekong@cuhk.edu.hk)

Wing Yee So: [wingyeeso@cuhk.edu.hk](mailto:wingyeeso@cuhk.edu.hk)

Ronald C.W. Ma: [rcwma@cuhk.edu.hk](mailto:rcwma@cuhk.edu.hk)

Juliana C.N. Chan: [jchan@cuhk.edu.hk](mailto:jchan@cuhk.edu.hk)

Ting-Fung Chan: [tf.chan@cuhk.edu.hk](mailto:tf.chan@cuhk.edu.hk)

\*To whom correspondence should be addressed

Ting-Fung Chan, School of Life Sciences, The Chinese University of Hong Kong, Shatin, NT, Hong Kong

Phone: (+852) 3943-6876; Fax: (+852) 2603-7246; Email: [tf.chan@cuhk.edu.hk](mailto:tf.chan@cuhk.edu.hk)

Juliana C.N. Chan, Department of Medicine and Therapeutics, The Chinese University of Hong Kong, Prince of Wales Hospital, Hong Kong

Phone: (+852) 2632-3138; Fax: (+852) 2632-3108; Email: [jchan@cuhk.edu.hk](mailto:jchan@cuhk.edu.hk)

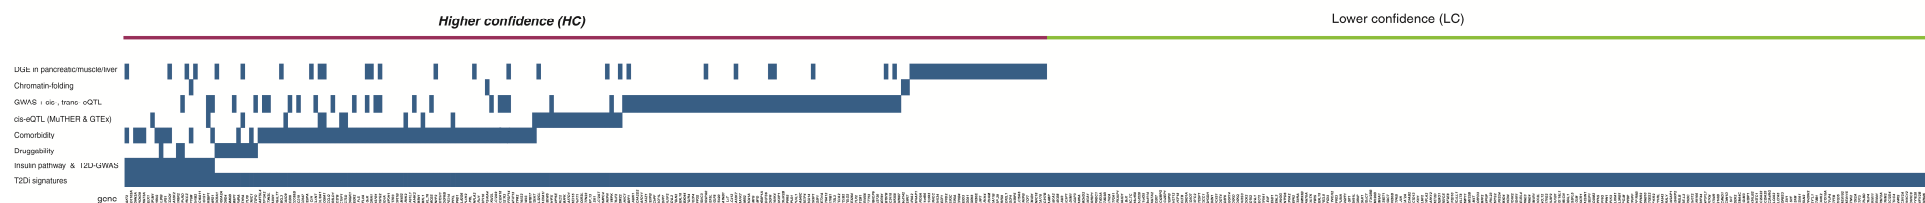

**Figure S1: Summary of genomics and functional properties for all T2D interactome signatures.** T2D interactome signatures overlapping with various genomics and functional properties are defined as follows: “DGE in T2D pancreatic/muscle/liver” indicates the signatures were also dysregulated in T2D relevant tissues, in addition to our discovery cohort; “Chromatin-folding” indicates the genes which may be distantly regulated by the GWAS SNPs reaching genome-wide significance in DIAGRAM-database; “GWAS + cis-, trans-eQTL” refers to the genes identified by the Sherlock statistical framework to be associated to T2D with the use of DIAGRAM-database, cis- and trans- eQTL signals; “cis-eQTL” refers to the SNPs in perfect LD to T2D interactome signatures with eQTL properties regulating these genes; “Comorbidity” refers to genes that are shared between T2D and comorbid diseases; “Druggability” indicates T2D druggable or potentially druggable targets; “Insulin & T2D-GWAS” refers to genes in the insulin pathway and T2D genes in GWAS Catalogue dysregulated in the T2D interactome signatures. The T2Di signatures overlapped with genomics and functional properties were considered to be higher confident set (HC), and those without were considered as the lower confidence set (LC).

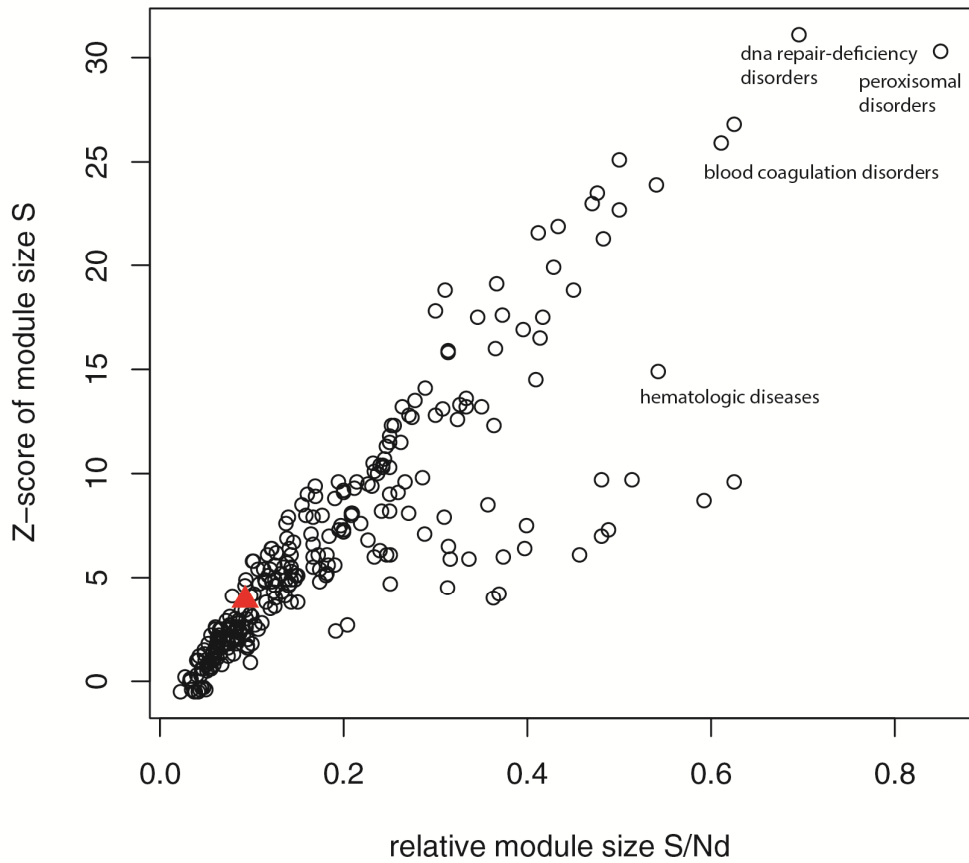

**Figure S2: Statistical significance of the observed module as measured by z-score and relative module size S/Nd for all diseases. Red triangle indicates the T2D largest connected component consisting of 9 disease genes.**

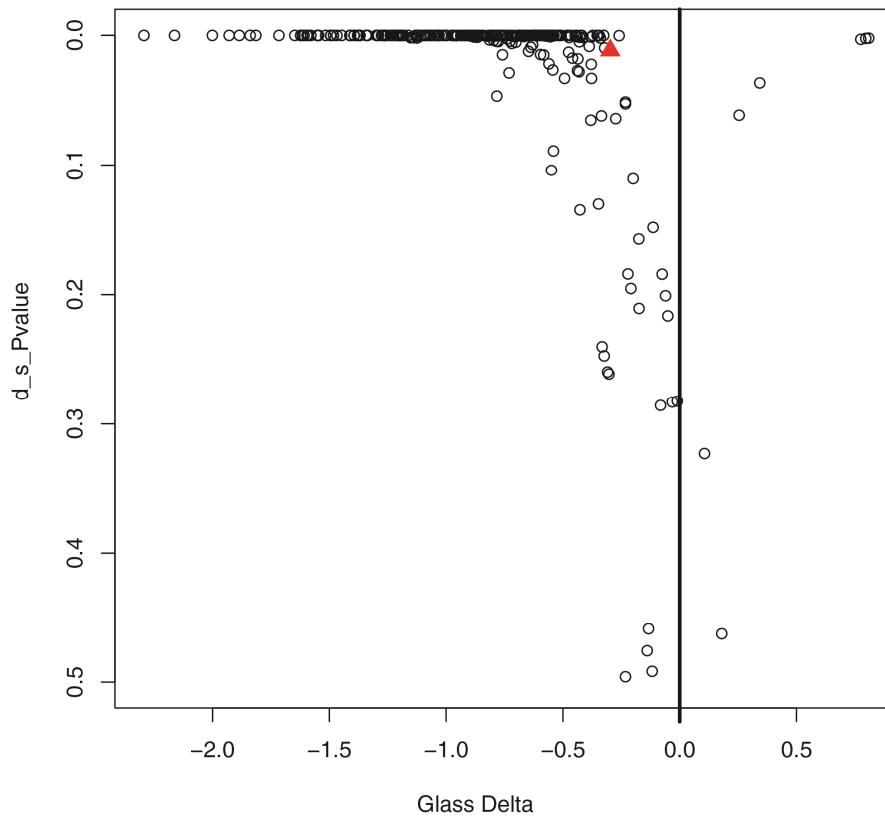

**Figure S3 Statistical significance ( $p$ -value) and effect size (Glass' Delta) of the module localization as measured by the mean network-based distance for all genes in the diseases. Red triangle indicates the T2D largest connected component. Positive/negative Glass's Delta indicates the standard deviation larger/smaller than the mean of random expectation. Here, the combined evidence of Glass's Delta approaching zero (-0.297) and the low  $p$ -value ( $p$ : 1.20E-2) suggested some T2D disease genes may not be localized to this largest connected component.**

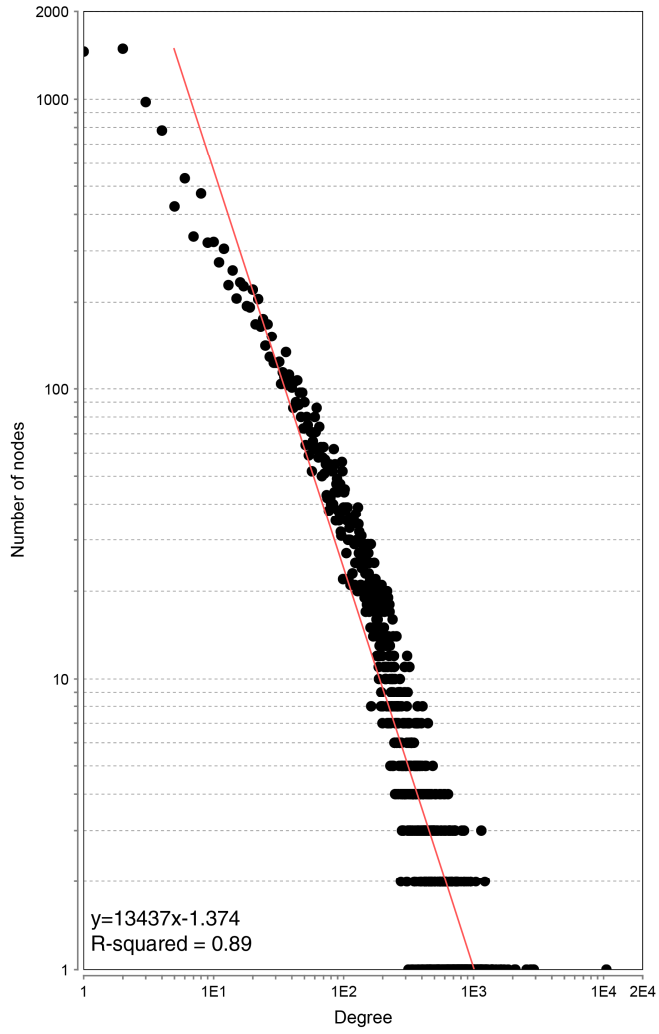

**Figure S4: The degrees of interaction of the nodes in the T2D interactome follow a power law distribution.**

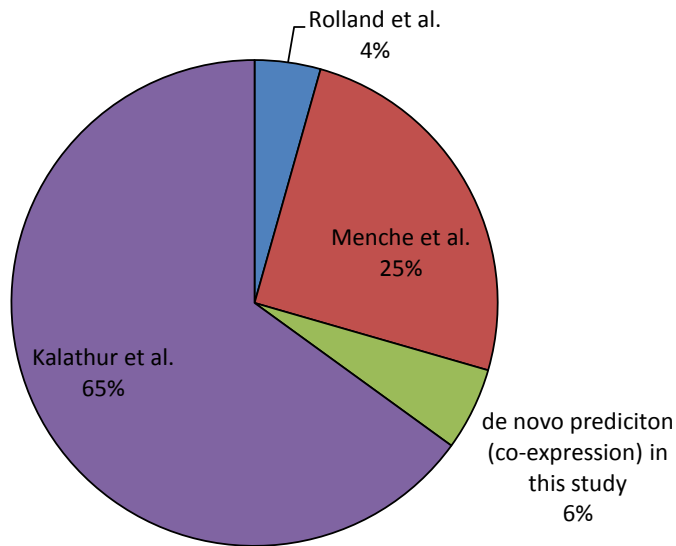

**Figure S5. Distribution of interaction sources in T2D interactome. The gene network information of the T2Di were assembled from peer reviewed publications shown in the references below, and also predicted using ARACHE based on co-expression patterns using RNA-Seq data generated in this study.**

#### *References*

1. Menche, J. *et al.* Disease networks. Uncovering disease-disease relationships through the incomplete interactome. *Science* **347**, 1257601 (2015).
2. Kalathur, R.K. *et al.* UniHI 7: an enhanced database for retrieval and interactive analysis of human molecular interaction networks. *Nucleic Acids Res* **42**, D408-14 (2014).
3. Rolland, T. *et al.* A proteome-scale map of the human interactome network. *Cell* **159**, 1212-26 (2014).

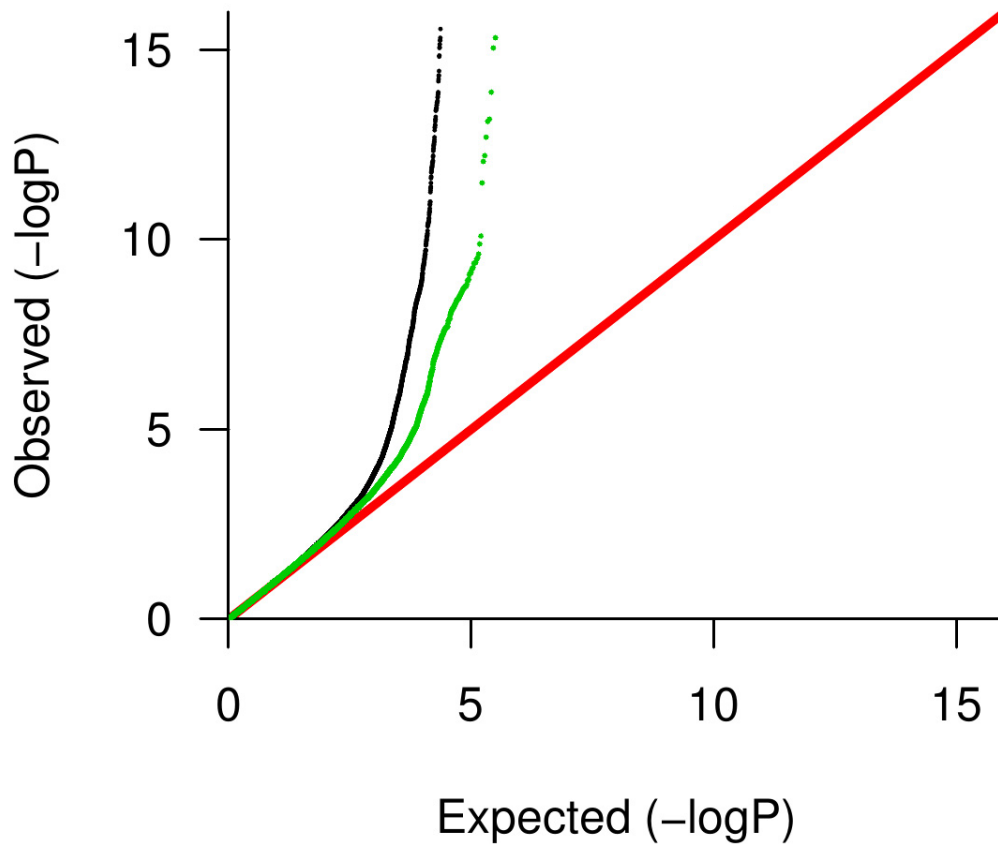

**Figure S6. Quantile-Quantile (QQ) plot of all associations in DIAGRAM meta-GWAS (black curve), and association signals after removing all known T2D disease loci (green curve).**

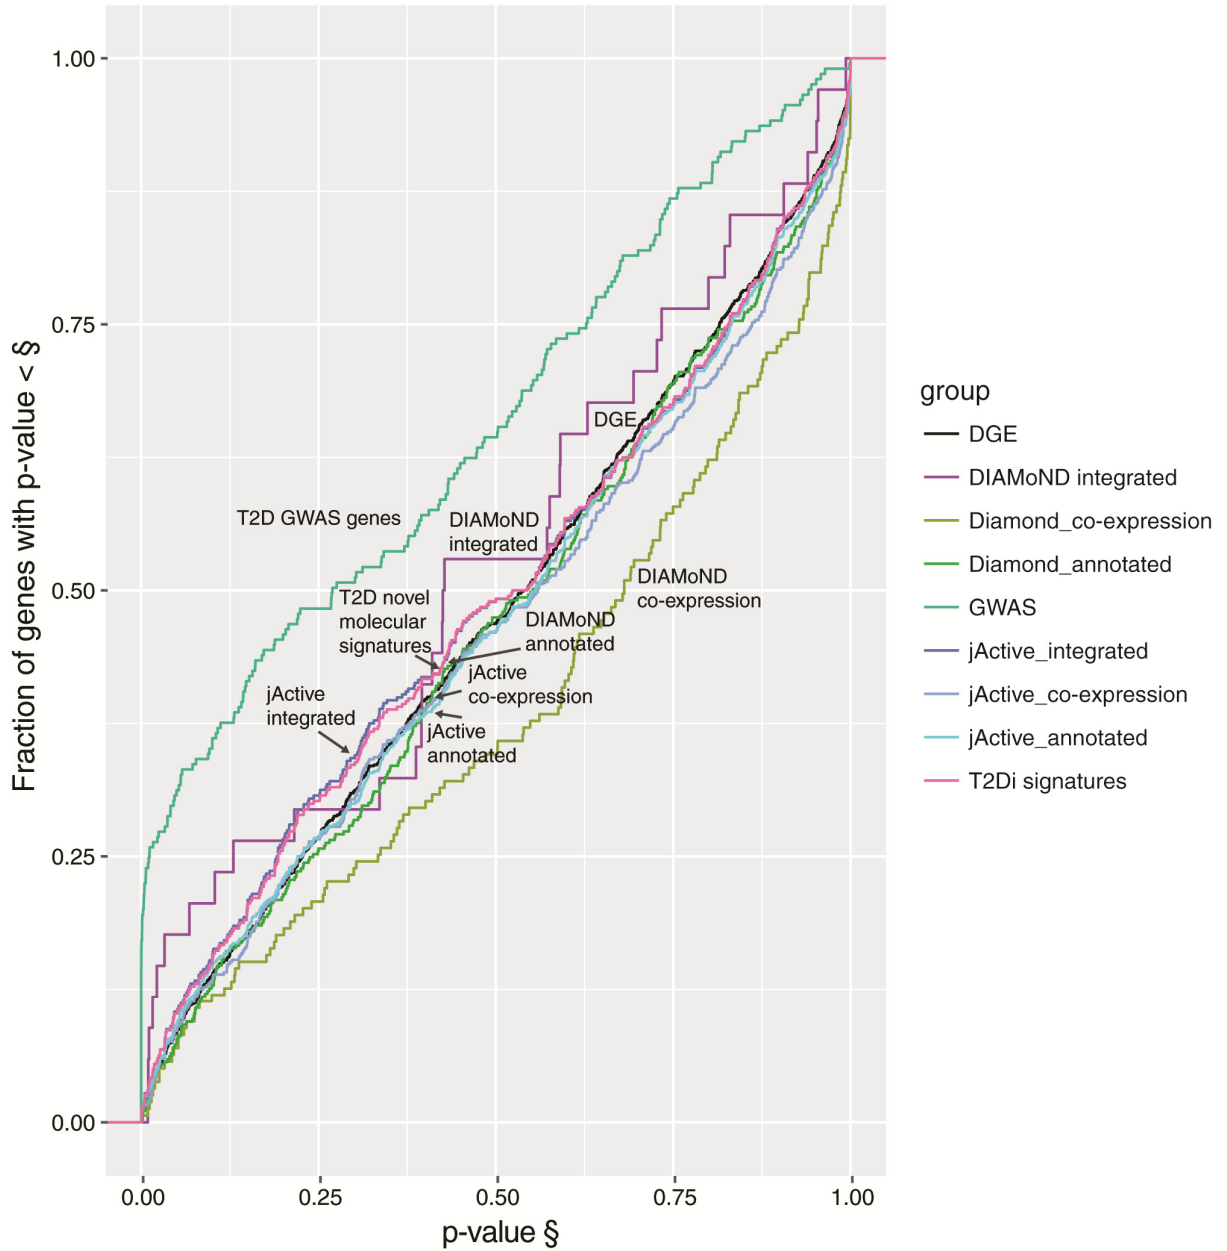

**Figure S7. Comparison of disease genes identified by DIAMoND and jActiveModules in co-expression network (predicted by ARACHE in this study), annotated physical interaction network (from publications) and integrated network (constructed in this study).**



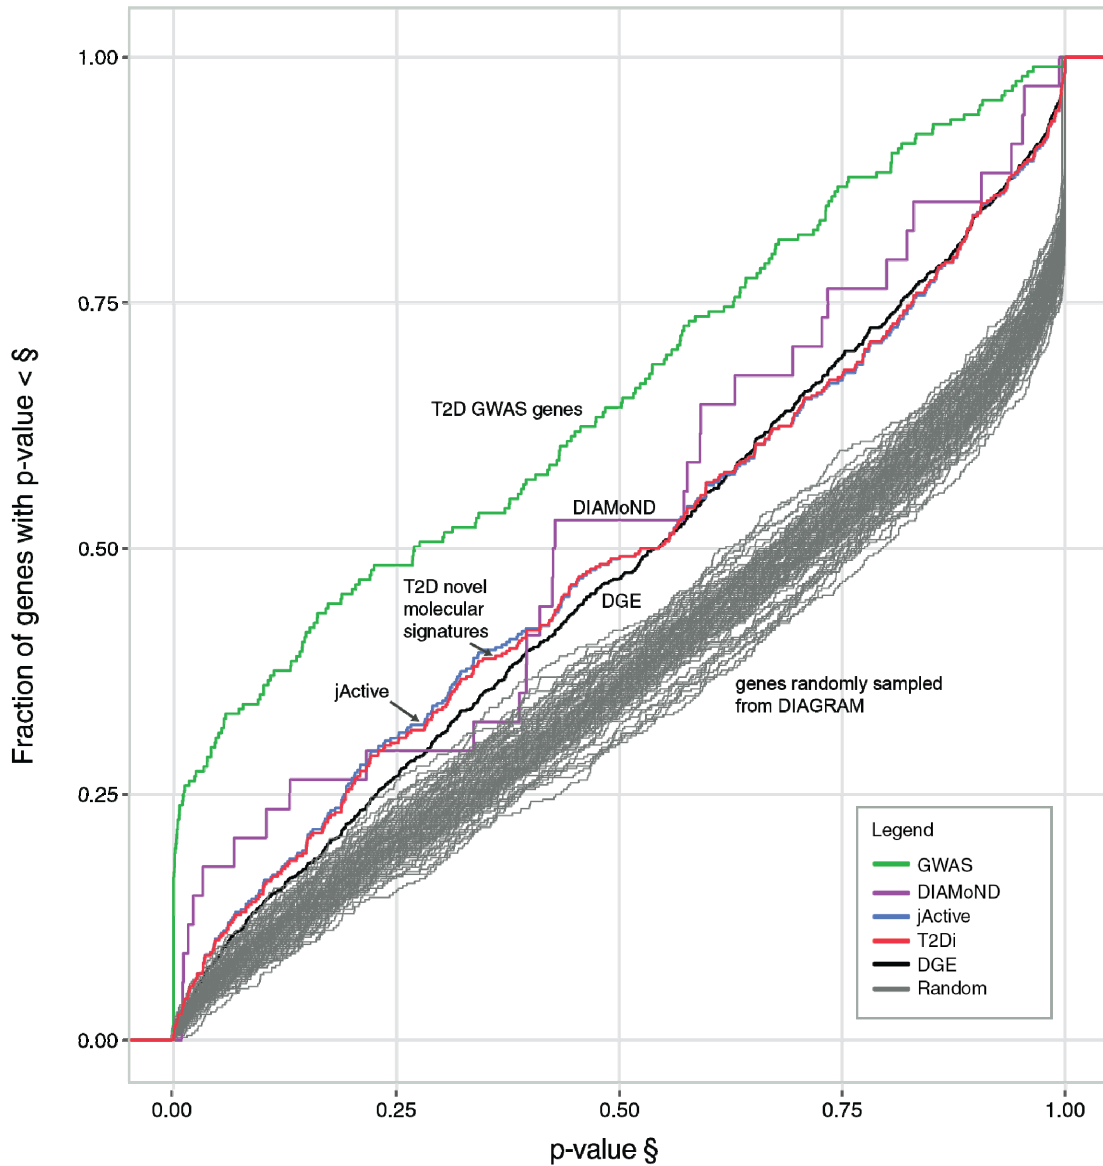

**Figure S8. Association of genes to T2D discovered by DIAMoND, jActive, T2Di signatures (combining DIAMoND and jActiveModules) and differentially expressed genes generated in this study.** Both DIAMoND, jActive and T2Di signatures were discovered using the integrated interactome. Association to T2D was assessed with respect to external & independent trans-ethnic GWAS data (DIAGRAM). Association to T2D of established T2D GWAS genes and 100 random gene sets were shown as comparison.

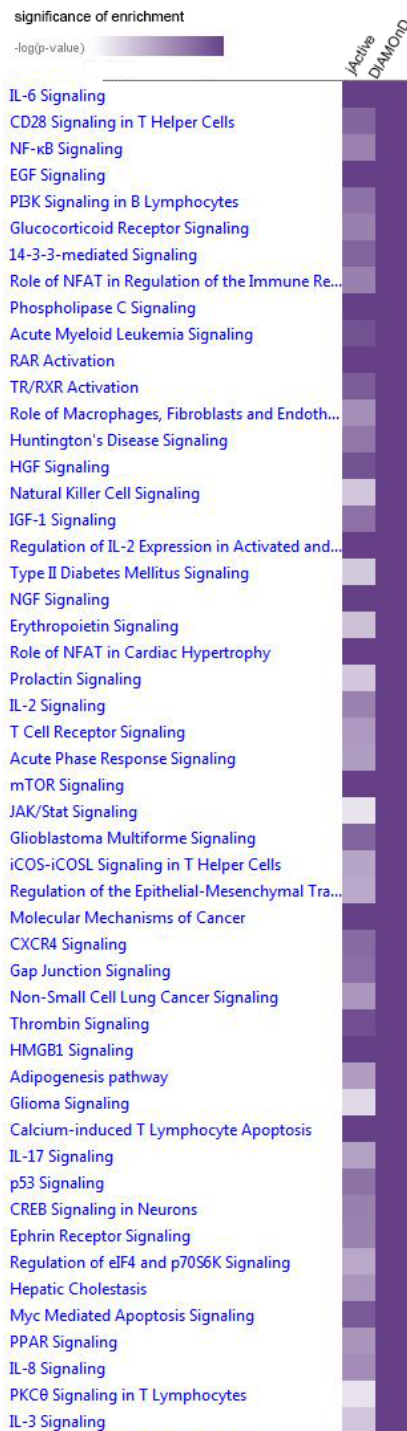

**Figure S9. DIAMoND and jActiveModules identified different set of genes (DIAMoND identified 39 genes whereas jActiveModules identified 401 molecular signatures. Both method identified 20 common genes.** The functional cohesiveness among genes discovered by DIAMoND and jActiveModules in T2Di signatures could first be demonstrated in the similarity of pathways enriched from respective methods.

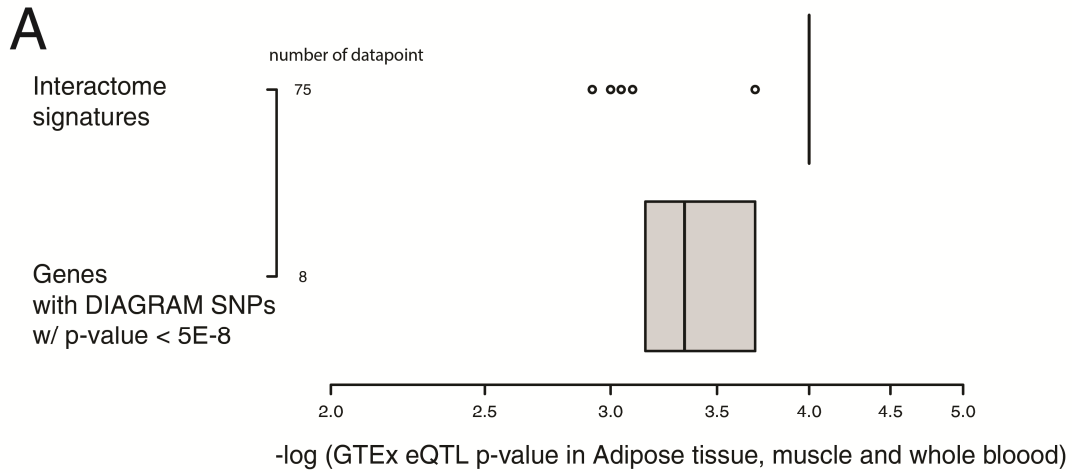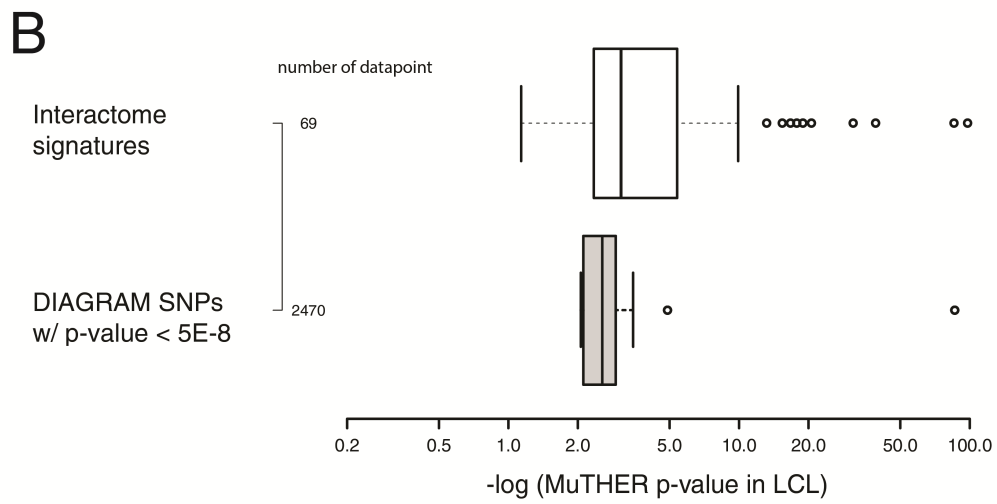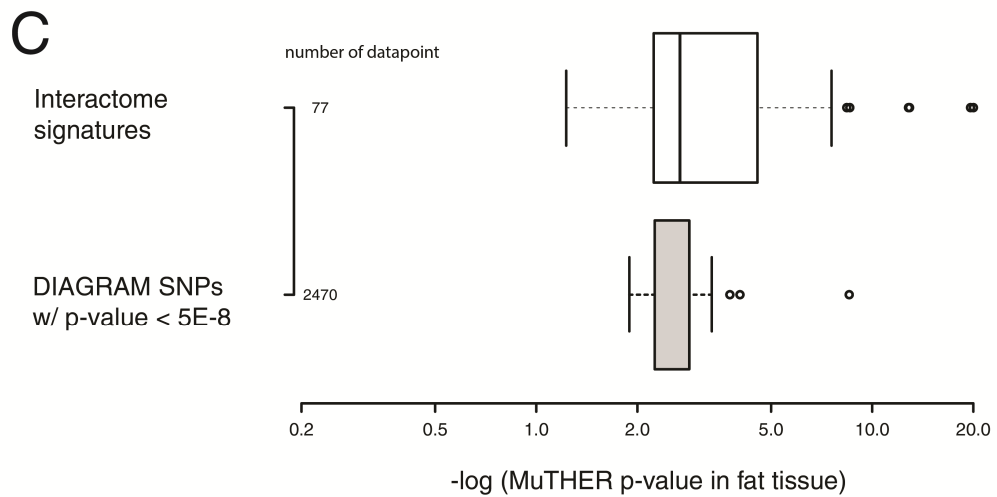

**Figure S10. Comparison of eQTL p-values between T2Di signatures and DIAGRAM GWAS loci.** T2Di signatures were compared to (A) GTEx adipose tissue, muscle and whole blood; (B) MuTHER LCL and (C) MuTHER fat tissues.

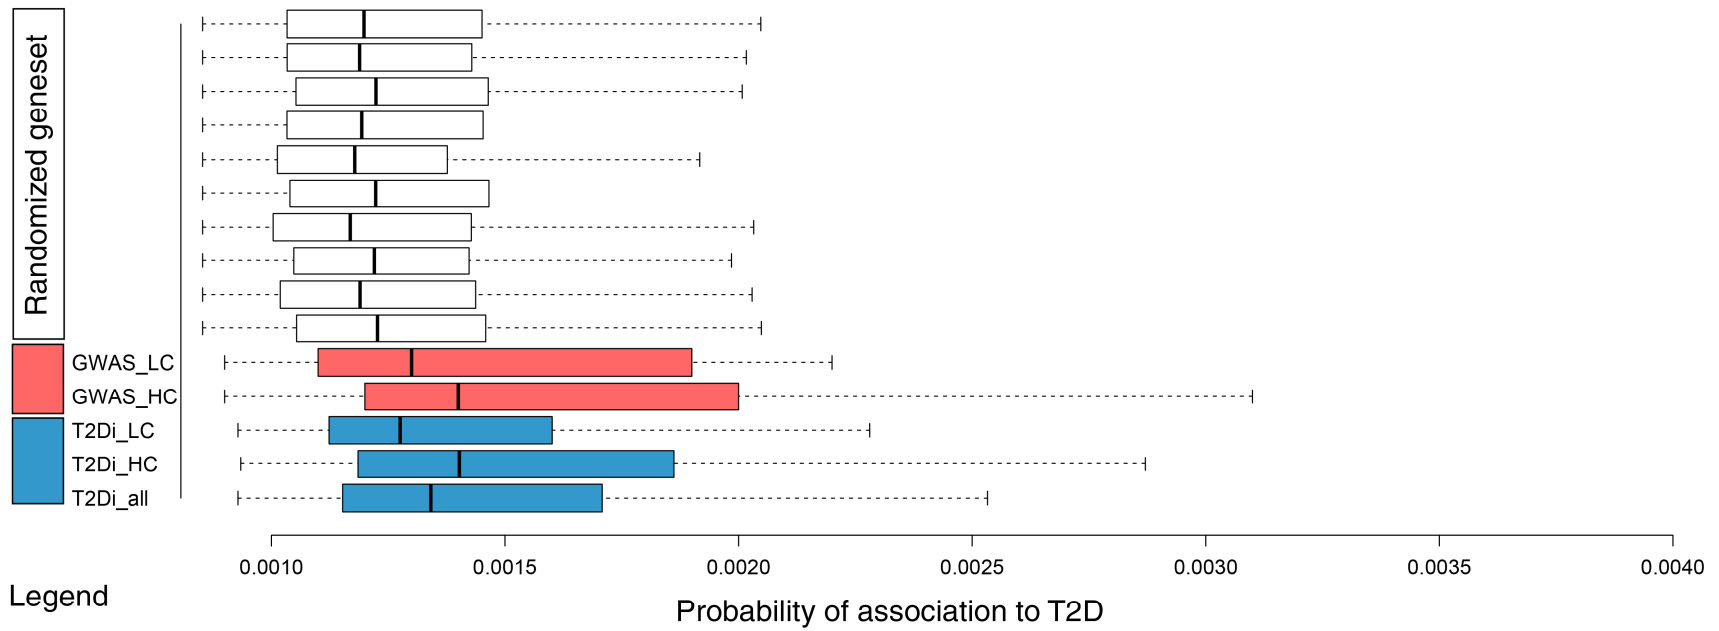

■ T2D-GWAS genes. HC = higher-confidence: the primary gene associated to the T2D Loci; LC = low-confidence.  
■ T2Di signatures. HC = higher-confidence: the signatures overlapping with genomics and functional properties; LC = low-confidence.

**Figure S11. Comparison of T2D association probability between T2Di signatures, T2D-GWAS genes and randomized gene sets.** The 10 set of randomized genes showed lower median probability association scores to T2D than the established GWAS genes and T2Di signature.

**Supplementary Table 1: Sequencing summary and statistics**

| Sample ID | Status  | Gender | Age | Raw reads (million) | Raw throughput (Gigabases) | Trimmed throughput (Gigabases) | Quality Trimmed % Mapped* |
|-----------|---------|--------|-----|---------------------|----------------------------|--------------------------------|---------------------------|
| ZN991     | Control | M      | 54  | 59                  | 4.5                        | 4.0                            | 89.20%                    |
| ZN993     | Control | M      | 51  | 69                  | 5.2                        | 4.3                            | 89.35%                    |
| ZN994     | Control | F      | 57  | 63                  | 4.7                        | 4.2                            | 89.45%                    |
| ZN995     | Control | F      | 61  | 46                  | 3.5                        | 3.2                            | 88.73%                    |
| ZN996     | Control | M      | 57  | 69                  | 5.2                        | 4.5                            | 89.43%                    |
| ZN1048    | Control | F      | 36  | 59                  | 4.5                        | 4.0                            | 89.60%                    |
| ZN1083    | Control | F      | 36  | 69                  | 5.3                        | 4.5                            | 91.23%                    |
| ZN1084    | Control | M      | 60  | 69                  | 5.3                        | 4.4                            | 92.55%                    |
| GS28      | Control | F      | 51  | 71                  | 5.4                        | 4.6                            | 93.19%                    |
| GS29      | Control | M      | 79  | 63                  | 4.8                        | 4.3                            | 94.14%                    |
| ZN1040    | DM      | M      | 57  | 71                  | 5.4                        | 4.6                            | 91.08%                    |
| ZN1041    | DM      | M      | 57  | 72                  | 5.5                        | 4.5                            | 91.20%                    |
| ZN1042    | DM      | F      | 64  | 72                  | 5.5                        | 4.6                            | 91.69%                    |
| ZN1043    | DM      | F      | 33  | 73                  | 5.5                        | 4.7                            | 91.12%                    |
| ZN1044    | DM      | M      | 55  | 70                  | 5.3                        | 4.6                            | 90.76%                    |
| ZN1045    | DM      | F      | 63  | 70                  | 5.3                        | 4.3                            | 90.87%                    |
| ZN1046    | DM      | M      | 64  | 68                  | 5.1                        | 4.6                            | 90.65%                    |
| ZN1085    | DM      | F      | 58  | 66                  | 5                          | 4.4                            | 91.81%                    |
| ZN1086    | DM      | M      | 47  | 69                  | 5.2                        | 4.6                            | 91.24%                    |
| ZN1047    | DM      | F      | 30  | 62                  | 4.7                        | 4.3                            | 91.46%                    |

**Supplementary Table 2: Available separately**

**Supplementary Table 3: Differential expression of T2D-dysregulated genes observed in PBMC from Chinese T2D patients**

| <i>Gene</i>     | <i>Description</i>                                                       | <i>Insulin path way</i> | <i>T2D GWA S candidate</i> | <i>Novel molecules</i> | <i>Fold Change (log 2)</i> | <i>B&amp;H adjusted p</i> |
|-----------------|--------------------------------------------------------------------------|-------------------------|----------------------------|------------------------|----------------------------|---------------------------|
| <i>AKT2</i>     | v-akt murine thymoma viral oncogene homolog 2                            | ✓                       | /                          | /                      | -0.78                      | 4.42E-04                  |
| <i>PRKCZ</i>    | protein kinase C, zeta                                                   | ✓                       | /                          | /                      | -0.77                      | 2.90E-02                  |
| <i>IRS1</i>     | insulin receptor substrate 1                                             | ✓                       | ✓                          | /                      | -0.98                      | 3.93E-03                  |
| <i>PIK3R2</i>   | phosphoinositide-3-kinase, regulatory subunit 2 (beta)                   | ✓                       | /                          | /                      | -0.886                     | 3.53E-04                  |
| <i>PPP1R3F</i>  | protein phosphatase 1, regulatory (inhibitor) subunit 3F                 | ✓                       | /                          | /                      | -1.082                     | 5.63E-04                  |
| <i>PYGM</i>     | phosphorylase, glycogen, muscle                                          | ✓                       | /                          | /                      | -0.966                     | 1.93E-03                  |
| <i>PRKAR1B</i>  | protein kinase, cAMP-dependent, regulatory, type I, beta                 | ✓                       | /                          | /                      | -1.005                     | 2.74E-04                  |
| <i>SH2B2</i>    | SH2B adaptor protein 2                                                   | ✓                       | /                          | /                      | -1.297                     | 1.45E-05                  |
| <i>TRIP10</i>   | thyroid hormone receptor interactor 10                                   | ✓                       | /                          | /                      | -0.859                     | 1.12E-02                  |
| <i>SREBF1</i>   | sterol regulatory element binding transcription factor 1                 | ✓                       | /                          | /                      | -1.400                     | 2.23E-11                  |
| <i>BAD</i>      | BCL2-associated agonist of cell death                                    | ✓                       | /                          | /                      | -0.841                     | 8.41E-03                  |
| <i>HRAS</i>     | v-Ha-ras Harvey rat sarcoma viral oncogene homolog                       | ✓                       | /                          | /                      | -0.982                     | 7.17E-04                  |
| <i>MAP2K2</i>   | mitogen-activated protein kinase kinase 2                                | ✓                       | /                          | /                      | -0.939                     | 2.56E-05                  |
| <i>ELK1</i>     | ELK1, member of ETS oncogene family                                      | ✓                       | /                          | /                      | -0.762                     | 3.37E-03                  |
| <i>SOCS1</i>    | suppressor of cytokine signaling 1                                       | ✓                       | /                          | /                      | -1.733                     | 1.58E-07                  |
| <i>WFS1</i>     | Wolfram syndrome 1                                                       | /                       | ✓                          | /                      | -0.88                      | 2.92 E-03                 |
| <i>KCNQ1</i>    | potassium voltage-gated channel, KQT-like subfamily, member 1            | /                       | ✓                          | /                      | -0.87                      | 3.43E-04                  |
| <i>CHCHD9</i>   | coiled-coil-helix-coiled-coil-helix domain containing 9                  | /                       | ✓                          | /                      | -1.17                      | 6.81E-05                  |
| <i>CDKN2A</i>   | cyclin-dependent kinase inhibitor 2A                                     | /                       | ✓                          | /                      | -0.87                      | 1.27 E-02                 |
| <i>SLC16A11</i> | solute carrier family 16, member 11 (monocarboxylic acid transporter 11) | /                       | ✓                          | /                      | -1.62                      | 5.23E-05                  |
| <i>GPSM1</i>    | G-protein signaling modulator 1 [Source:HGNC Symbol;Acc:17858]           | /                       | ✓                          | /                      | -1.27                      | 6.33E-04                  |
| <i>CCDC102A</i> | coiled-coil domain containing 102A                                       | /                       | ✓                          | /                      | -1.34                      | 6.26E-06                  |
| <i>IL2RB</i>    | interleukin 2 receptor, bet                                              | /                       | ✓                          | /                      | -0.86                      | 8.41E-05                  |
| <i>PPARD</i>    | peroxisome proliferator-activated receptor delta                         | /                       | ✓                          | /                      | -0.94                      | 3.78E-05                  |
| <i>DNMT3A</i>   | DNA (cytosine-5-)-methyltransferase 3 alpha                              | /                       | ✓                          | /                      | -0.86                      | 1.43E-04                  |

Abbreviations: **B&H adjusted p**: nominal p-value adjusted by Benjamini and Hochberg method for multiple testing

#### Supplementary Table 4: Up-regulation of immune related genes in T2D PBMC

| Gene           | Description                                                   | Fold up-regulated in T2D | P-value  | B&H adjusted p-value |
|----------------|---------------------------------------------------------------|--------------------------|----------|----------------------|
| <i>CAMP</i>    | cathelicidin antimicrobial peptide                            | 4.84                     | 2.25E-16 | 2.20E-13             |
| <i>CCL8</i>    | chemokine (C-C motif) ligand 8                                | 3.91                     | 1.71E-05 | 5.50E-04             |
| <i>CCR2</i>    | chemokine (C-C motif) receptor 2                              | 1.47                     | 3.04E-03 | 3.13E-02             |
| <i>CXCL10</i>  | chemokine (C-X-C motif) ligand 10                             | 2.22                     | 3.17E-04 | 5.50E-03             |
| <i>INHBA</i>   | inhibin, beta A                                               | 3.96                     | 2.30E-06 | 1.11E-04             |
| <i>LTF</i>     | lactotransferrin                                              | 5.09                     | 6.27E-25 | 2.02E-21             |
| <i>PPBP</i>    | pro-platelet basic protein (chemokine (C-X-C motif) ligand 7) | 2.32                     | 4.61E-09 | 6.56E-07             |
| <i>S100A10</i> | S100 calcium binding protein A10                              | 1.63                     | 2.11E-04 | 4.05E-03             |
| <i>S100A12</i> | S100 calcium binding protein A12                              | 1.82                     | 2.49E-05 | 7.54E-04             |
| <i>S100P</i>   | S100 calcium binding protein P                                | 1.87                     | 2.97E-03 | 3.08E-02             |
| <i>SELP</i>    | carboxyl ester lipase pseudogene                              | 1.88                     | 1.58E-04 | 3.20E-03             |
| <i>TLR1</i>    | toll-like receptor 1                                          | 1.60                     | 7.90E-04 | 1.13E-02             |
| <i>TLR2</i>    | toll-like receptor 2                                          | 1.70                     | 7.29E-05 | 1.75E-03             |
| <i>TLR4</i>    | toll-like receptor 4                                          | 1.44                     | 4.88E-03 | 4.33E-02             |
| <i>TLR5</i>    | toll-like receptor 5                                          | 1.55                     | 3.36E-03 | 3.34E-02             |
| <i>TLR6</i>    | toll-like receptor 6                                          | 1.61                     | 2.71E-03 | 2.88E-02             |
| <i>TLR7</i>    | toll-like receptor 7                                          | 1.73                     | 2.25E-04 | 4.24E-03             |
| <i>TLR8</i>    | toll-like receptor 8                                          | 1.77                     | 2.07E-05 | 6.47E-04             |

Abbreviations: **B&H**: nominal p-value adjusted by Benjamini and Hochberg method for multiple testing

#### Supplementary Table 5: Measure of perturbation of biological pathway by SPIA

| KEGG pathway                            | Total Accumulation of perturbation | p-value  | Pathway Status |
|-----------------------------------------|------------------------------------|----------|----------------|
| Circadian rhythm - mammal               | 7.695                              | 5.00E-06 | Activated      |
| Cytokine-cytokine receptor interaction  | 13.788                             | 2.00E-03 | Activated      |
| Measles                                 | 15.197                             | 3.00E-03 | Activated      |
| Basal cell carcinoma                    | -17.686                            | 3.00E-03 | Inhibited      |
| Toxoplasmosis                           | 13.964                             | 1.00E-02 | Activated      |
| Axon guidance                           | -15.423                            | 1.00E-02 | Inhibited      |
| Olfactory transduction                  | 20.129                             | 1.00E-02 | Activated      |
| Dopaminergic synapse                    | -6.475                             | 1.50E-02 | Inhibited      |
| Wnt signaling pathway                   | -10.315                            | 2.40E-02 | Inhibited      |
| Chemokine signaling pathway             | 23.599                             | 2.70E-02 | Activated      |
| Transcriptional misregulation in cancer | -1.372                             | 3.30E-02 | Inhibited      |

Supplementary Table 6: Available separately  
 Supplementary Table 7: Available separately  
 Supplementary Table 8: Available separately

**Supplementary Table 9: DIAGRAM *p*-values of the interactome signature having rSNP/eQTL property**

| <b>Interactome signatures</b> | <b>rSNP of the interactome signatures</b> | <b>eQTL* in GTEx</b> | <b>eQTL* in MuTHE R LCL</b> | <b>eQTL* in MuTHE R Fat</b> |
|-------------------------------|-------------------------------------------|----------------------|-----------------------------|-----------------------------|
| <i>PFKL</i>                   | 0.024                                     | 0.024                |                             |                             |
| <i>ALS2CL</i>                 | 0.0032                                    | 0.0053               |                             |                             |
| <i>CARD9</i>                  | 0.0019                                    | 0.033                |                             |                             |
| <i>COL18A1</i>                | 0.0016                                    |                      |                             |                             |
| <i>CTDP1</i>                  | 0.0034                                    | 0.024                |                             |                             |
| <i>H1FX</i>                   | 0.0031                                    |                      | 0.0026                      | 0.0026                      |
| <i>KLC2</i>                   | 0.03                                      |                      |                             |                             |
| <i>LRRK2</i>                  | 0.001                                     | 0.0036               |                             |                             |
| <i>MAP7D1</i>                 | 0.0083                                    | 0.036                |                             |                             |
| <i>PHPT1</i>                  | 0.0057                                    |                      | 0.0069                      |                             |
| <i>RPL13</i>                  | 0.0042                                    |                      |                             |                             |
| <i>SF11</i>                   | 0.0027                                    |                      |                             |                             |
| <i>SLC12A7</i>                | 0.0046                                    | 0.0068               |                             |                             |
| <i>SREBF1</i>                 | 0.00074                                   | 0.0035               |                             |                             |
| <i>SYMPK</i>                  | 0.001                                     |                      |                             |                             |
| <i>CACNA1I</i>                | 0.00069                                   |                      | 0.0082                      |                             |
| <i>COL6A1</i>                 | 0.00091                                   |                      |                             |                             |
| <i>CTSD</i>                   | 0.027                                     |                      |                             |                             |
| <i>FBXW5</i>                  | 0.0057                                    |                      |                             |                             |
| <i>GPSM1</i>                  | 0.0019                                    |                      |                             | 0.033                       |
| <i>INPP5E</i>                 | 0.00053                                   |                      |                             |                             |
| <i>MAFK</i>                   | 0.000076                                  |                      |                             |                             |
| <i>MED15</i>                  | 0.034                                     |                      |                             |                             |
| <i>MKL1</i>                   | 0.0024                                    |                      |                             |                             |
| <i>POLR2L</i>                 | 0.03                                      |                      |                             |                             |
| <i>PTPN23</i>                 | 0.0019                                    |                      |                             |                             |
| <i>SNAPC4</i>                 | 0.002                                     |                      |                             |                             |
| <i>SNRPN</i>                  | 0.00093                                   |                      |                             |                             |
| <i>THRA</i>                   | 0.007                                     |                      |                             |                             |
| <i>TRAF2</i>                  | 0.0057                                    |                      |                             |                             |
| <i>ZGPAT</i>                  | 0.007                                     |                      |                             |                             |
| <i>ZMIZ2</i>                  | 0.025                                     |                      |                             |                             |

**Note:**

**QTL in GTEx:** DIAGRAM SNP + SNPs in perfect LD ( $r^2: 1$  and  $D': 1$ ) to interactome signatures were queried to GTEx eQTL data in skeletal muscle, whole blood and subcutaneous fat

\* eQTL *p*-value <0.05



Supplementary Table 10: Available separately  
 Supplementary Table 11: Available separately  
 Supplementary Table 12: Available separately

**Supplementary Table 13: Clinical parameters of the participating T2D patients and controls in the discovery cohort**

|                            | <b>T2D</b>   | <b>Control</b> |
|----------------------------|--------------|----------------|
| Number of subjects         | 10           | 10             |
| Sex (M/F)                  | 5/5          | 5/5            |
| Age                        | 52.8 ± 12.3  | 54.2 ± 12.4    |
| Age of T2DM onset          | 30.2 ± 8.1   | n/a            |
| Duration of T2DM           | 22.6 ± 11.8  | n/a            |
| BMI                        | 31.5 ± 4.8   | 21.6 ± 1.8     |
| SBP (mmHg)                 | 136.5 ± 13.7 | 116.2 ± 12.6   |
| DBP (mmHg)                 | 82.8 ± 10.1  | 75.3 ± 11.7    |
| Fasting glucose (mmol/l)   | 10.3 ± 4.8   | 5.8 ± 1.4      |
| HbA1c                      | 8.4 ± 2.3    | n/a            |
| Total cholesterol (mmol/l) | 4.2 ± 0.6    | 5.1 ± 0.6      |
| HDL-C (mmol/l)             | 1.2 ± 0.4    | 1.5 ± 0.4      |
| LDL-C (mmol/l)             | 2.2 ± 0.6    | 3.1 ± 0.6      |
| Triglycerides (mmol/l)     | 1.9 ± 1.0    | 1.1 ± 0.5      |

Abbreviations: **BMI**: body mass index, **SBP**: systolic blood pressure, **DBP**: diastolic blood pressure, **HbA1c**: hemoglobin A1c, **HDL-C**: high-density lipoprotein cholesterol, **LDL-C**: low-density lipoprotein cholesterol

**Supplementary Table 14: Clinical parameters of the participating T2D patients and controls in the replication cohort**

|                            | <b>T2D</b>   | <b>Control</b> |
|----------------------------|--------------|----------------|
| Number of subjects         | 66           | 67             |
| Sex (M/F)                  | 21/45        | 27/40          |
| Age                        | 51.1 ± 7.3   | 49.9 ± 9.6     |
| BMI                        | 29.9 ± 4.7   | 22.5 ± 2.4     |
| SBP (mmHg)                 | 135.6 ± 15.3 | 115.8 ± 12.0   |
| DBP (mmHg)                 | 82.4 ± 10.9  | 73.1 ± 11.0    |
| Fasting glucose (mmol/l)   | 9.2 ± 4.6    | 4.7 ± 0.4      |
| HbA1c                      | 8.2 ± 1.9    | n/a            |
| Total cholesterol (mmol/l) | 4.8 ± 0.9    | 5.2 ± 0.8      |
| HDL-C (mmol/l)             | 1.3 ± 0.4    | 1.8 ± 0.4      |
| LDL-C (mmol/l)             | 2.8 ± 0.8    | 3.1 ± 0.7      |
| Triglycerides (mmol/l)     | 1.9 ± 2.0    | 0.9 ± 0.3      |

Abbreviations: **BMI**: body mass index, **SBP**: systolic blood pressure, **DBP**: diastolic blood pressure, **HbA1c**: hemoglobin A1c, **HDL-C**: high-density lipoprotein cholesterol, **LDL-C**: low-density lipoprotein cholesterol

**Supplementary Table 15: Primer list for qPCR replication**

| <i>Gene</i>    | <i>Forward Primer</i>       | <i>Reverse Primer</i>        | <i>Product size (bp)</i> |
|----------------|-----------------------------|------------------------------|--------------------------|
| <b>SLC12A9</b> | <i>GCAAAACCAACGACAAGGAT</i> | <i>CTGTCGTCACCACTGTGCTT</i>  | 184                      |
| <b>SRRT</b>    | <i>ACTTCATCCTGGCACTCACC</i> | <i>CCGAAGACATCAAGCACAGA</i>  | 205                      |
| <b>SREBF1</b>  | <i>AGGTGGAGGACACACTGACC</i> | <i>CAGGACAGGCAGAGGAAGAC</i>  | 241                      |
| <b>SRF</b>     | <i>ACGACCTTCAGCAAGAGGAA</i> | <i>GAGAGTCTGGCGAGTTGAGG</i>  | 199                      |
| <b>MLST8</b>   | <i>GCACCGGAAACTGCTATGTC</i> | <i>ACGTCCTCCAGATCTTGACAC</i> | 180                      |
| <b>CEBPB</b>   | <i>GCACAGCGACGAGTACAAGA</i> | <i>AGCTGCTCCACCTTCTTCTG</i>  | 153                      |
